# Supplementary material
Source: MDPI journal article supplement (https://www.mdpi.com/2306-5338/10/11/205)
Supplement: s1 [file s1]

# Sea-Level Rise in Pakistan: Recommendations for Strengthening Evidence-Based Coastal Decision-Making: Supplementary material

Weeks et al., 2023

**Table S1:** Comparison of local mean sea-level change (m) at Karachi, Ormara and Gwadar projected by Harrison (2020) and Harrison et al., (2021), following the methods of Palmer et al., (2018) and Palmer et al. (2020) and IPCC AR6 (Fox-Kemper et al., 2021; Garner et al., 2021; Kopp et al., 2023) under RCP2.6 or SSP1-2.6 and RCP8.5 and SSP5-8.5 emissions scenarios. Harrison et al., projections are relative to a baseline of 1986-2005, and IPCC AR6 projections are relative to a baseline of 1995-2014.

| RCP8.5/SSP5-8.5              | 2100             |                  | 2150             |
|------------------------------|------------------|------------------|------------------|
| Sea-level change (m) at 2100 | Harrison et al.  | IPCC AR6         | IPCC AR6         |
| Karachi                      | 0.56 (0.24-0.95) | 0.72 (0.53-1.00) | 1.25 (0.84-1.86) |
| Ormara                       | 0.63 (0.39-0.98) | 0.74 (0.50-1.05) | 1.95 (0.81-4.85) |
| Gwadar                       | 0.68 (0.44-1.03) | 0.76 (0.53-1.07) | 1.31 (0.84-1.95) |

| RCP2.6/SSP1-2.6              | 2100              |                  | 2150             |
|------------------------------|-------------------|------------------|------------------|
| Sea-level change (m) at 2100 | Harrison et al.   | IPCC AR6         | IPCC AR6         |
| Karachi                      | 0.21 (-0.05-0.50) | 0.36 (0.22-0.55) | 0.57 (0.31-0.92) |
| Ormara                       | 0.29 (0.11-0.53)  | 0.37 (0.18-0.60) | 0.59 (0.26-0.99) |
| Gwadar                       | 0.33 (0.17-0.56)  | 0.40 (0.21-0.63) | 0.30 (0.63-1.03) |
